# Supplementary material
Source: Royal Society of Chemistry journal article supplement (doi:10.1039/d6ay00643d)
Supplement: d6ay00643d1.pdf [file d6ay00643d1.pdf]

1

## *Supporting Information*

2 **A Multi-Modal Lateral Flow Assay Driven by MWCNTs/Fe-N-C for the**

3 **Detection of Bisphenol A in Lake**

4 *Zhi-Ru Bi<sup>b</sup>, Ming-Hui Shi<sup>a</sup>, Ting-Ting Chen<sup>b</sup>, Yong-Biao Sun<sup>a</sup>, Yu-Rui Zhou<sup>c</sup>, Lin-*  
5 *Jing Wang<sup>a</sup>, Huai-Rong Zhang<sup>a,\*</sup>, Guo-Dong Liu<sup>c,\*</sup>.*

6 *a Collaborative Innovation Center of Tumor Marker Detection Technology,*  
7 *Equipment and Diagnosis Therapy Integration in Universities of Shandong, Shandong*  
8 *Province Key Laboratory of Detection Technology for Tumor Makers, College of*  
9 *Medicine, Linyi University, Linyi, 276005, China.*

10 *b Collaborative Innovation Center of Tumor Marker Detection Technology,*  
11 *Equipment and Diagnosis-Therapy Integration in Universities of Shandong, Shandong*  
12 *Province Key Laboratory of Detection Technology for Tumor Makers, School of*  
13 *Chemistry and Chemical Engineering, Linyi University, Linyi, 276005, China.*

14 *c Intelligent Biosensing Laboratory, College of Medicine, Linyi University, Linyi,*  
15 *276005, China.*

16 *\* Corresponding authors: zhanghuairong999@126.com; liuguodong2@lyu.edu.cn.*

## 18 **Experimental section**

19 **Material and reagents.** Carboxylated multi-walled carbon nanotubes (MWCNT) with  
20 the length of >50 nm were purchased from Nanjing Xian-Feng Nanomaterials  
21 Technology Co., Ltd. carbodiimide hydrochloride (EDC), N-Hydroxysuccinimide  
22 (NHS), 3,3',5,5'-tetramethylbenzidine (TMB), Pyrrole and Bisphenol A were obtained  
23 from Macklin Biochemical Co., Ltd (Shanghai). Streptavidin (SA), bovine serum  
24 albumin (BSA), and all the DNA oligonucleotides used herein were purchased from  
25 Sangon Biotechnical Engineering Co., Ltd. All the reagents were of analytical grade  
26 and solutions were prepared with ultrapure water.

27 The DNA oligonucleotide sequences were as follows:

28 Conjugated probe 1: 5'-NH<sub>2</sub>C<sub>6</sub>-ATCGACGGGTTTCGCACCACCAGTG-3'.

29 T line probe: 5'-Bio-CCGGTGGGTGGTCAGGTGGGATAGCGTTCCGCGTAT  
30 GGCCCAGCGCATCACGGGTTTCGCACCACACTGGTGGTGCGAACCCGTG-3'.

31 C line probe: 5'-bio-CACTGGTGGTGCGAACCCGTCGAT-3'.

32 **Instruments.** Transmission electron microscopy (TEM) images were carried out on  
33 JEM-F200 electron microscope (JEOL, Japan) and HT7800 (Hitachi, Japan). Zeta  
34 potential and size of nanoparticles were provided on zeta-sizer nano (Zen 3600,  
35 Malvern Instruments Ltd). The UV-vis absorption spectra recorded by UV-vis  
36 spectrophotometer (Cary60, Agilent). The functional group of nanoagents were  
37 performed by FT-IR spectrometer (Nicolet iS5, Thermo Scientific). The XYZ3010  
38 dispensing platform and Guillotine cutting module CM3010 were purchased from  
39 Shanghai Jiening Biological Technology Co. Ltd. (Shanghai, China). The portable test

40 strip reader (DT2032) was bought from Shanghai Goldbio Tech. Co. Ltd. (Shanghai,  
41 China).

42 **Transmission Electron Microscopy (TEM) Analysis.** To observe the microstructural  
43 morphology of the materials, MWCNTs/Fe-N-C and MWCNTs/Fe-N-C/ssDNA<sub>1</sub>  
44 nanomaterials were individually dispersed in deionized water and subjected to  
45 ultrasonic treatment (40 kHz, 300 W, 15 min) to achieve a well-dispersed solution with  
46 nearly no color. A small amount of the dispersion was dropped onto a carbon-coated  
47 copper grid and air-dried. The samples were then examined using a transmission  
48 electron microscope (JEM-2100, Hitachi, Japan) to observe the morphological features,  
49 tubular structure, and surface coverage after ssDNA loading.

50 **Zeta Potential and Particle Size Analysis.** To evaluate the dispersibility and surface  
51 charge characteristics, MWCNTs/Fe-N-C and MWCNTs/Fe-N-C/ssDNA<sub>1</sub>  
52 nanomaterials were diluted to a nearly colorless dispersion and sonicated. The  
53 hydrodynamic particle size distribution and zeta potential were measured using a  
54 nanoparticle size and zeta potential analyzer (ZEN 3600, Malvern Instruments Ltd,  
55 UK). By comparing the particle size and zeta potential before and after ssDNA<sub>1</sub> loading,  
56 the surface modification efficiency and dispersion stability of the nanomaterials were  
57 further analyzed.

58 **UV-Vis Absorption Spectroscopy Analysis.** A UV-Vis spectrophotometer (UV-2600,  
59 Shimadzu, Japan) was used to record the absorption spectra of MWCNTs/Fe-N-C,  
60 MWCNTs/Fe-N-C/ssDNA<sub>1</sub>, and free ssDNA<sub>1</sub>. The samples were diluted and scanned  
61 over the wavelength range of 200-400 nm. Particular attention was paid to the

62 characteristic absorption peak at 260 nm to verify the successful immobilization of  
63 ssDNA<sub>1</sub> on the nanomaterial surface.

64 **Peroxidase-like Activity and Steady-State Kinetic Assay of MWCNTs/Fe-N-C.** The  
65 peroxidase-like catalytic activity of MWCNTs/Fe-N-C was evaluated using a TMB-  
66 H<sub>2</sub>O<sub>2</sub> colorimetric system. Specifically, 20 µg/mL of MWCNTs/Fe-N-C was added to  
67 a PBS buffer solution (pH 5.8) containing 0.5 mM TMB and 10 mM H<sub>2</sub>O<sub>2</sub>. After  
68 incubation at room temperature (~ 25°C) for 10 minutes, the absorbance at 652 nm was  
69 recorded using a UV-Vis spectrophotometer to assess the formation of the blue-colored  
70 oxidized TMB (oxTMB) product.

71 To further investigate the catalytic kinetics, steady-state kinetic studies were performed  
72 by either fixing the TMB concentration at 500 µM and varying H<sub>2</sub>O<sub>2</sub> concentrations  
73 (0.5, 1.0, 2.0, 3.0, 5.0, 10.0, 20.0, and 30.0 mM), or by fixing the H<sub>2</sub>O<sub>2</sub> concentration at  
74 10 mM and varying TMB concentrations (0.2, 0.4, 0.6, 0.8, 1.0, 1.2, 1.4, 1.6, and 1.8  
75 mM). In each experiment, 20 µg of MWCNTs/Fe-N-C was dispersed in 1 mL PBS (pH  
76 5.8), and the initial reaction rates were recorded.

77 The Michaelis-Menten plots were constructed based on the experimental data, and the  
78 kinetic parameters, including the Michaelis constant (K<sub>m</sub>) and maximum reaction rate  
79 (V<sub>max</sub>), were calculated using the Lineweaver-Burk double reciprocal plot, described  
80 by the following equation:

$$\frac{1}{v} = \frac{K_m}{V_{max}} \times \frac{1}{[S]} + \frac{1}{V_{max}} \text{ (Formula S1)}$$

82 Where  $v$  is the initial reaction rate,  $[S]$  is the substrate concentration,  $K_m$  is the Michaelis  
83 constant,  $V_{max}$  is the maximum reaction rate.

84 
$$v = \frac{c}{t} \text{ (Formula S2)}$$

85 
$$A = \varepsilon \times l \times c \text{ (Formula S3)}$$

86 Where A is the absorbance value of the solution at 652 nm,  $\varepsilon$  is the molar extinction  
87 coefficient of oxTMB at 652 nm ( $3.9 \times 10^4 \text{ M}^{-1} \text{ cm}^{-1}$ ), l is the thickness of the solution,  
88 and c is the concentration of oxTMB.

89 This kinetic analysis provides insights into the substrate affinity and catalytic efficiency  
90 of MWCNTs/Fe-N-C.

91 **Evaluation of Photothermal Capability of MWCNTs/Fe-N-C.** To systematically  
92 evaluate the photothermal response performance of MWCNTs/Fe-N-C, 500  $\mu\text{L}$  of a 50  
93  $\mu\text{g/mL}$  MWCNTs/Fe-N-C dispersion was placed in a transparent centrifuge tube. The  
94 sample was irradiated with an 808 nm near-infrared (NIR) laser at a power density of  
95  $2.0 \text{ W/cm}^2$  for 2 minutes. Temperature changes were recorded every 10 seconds using  
96 an infrared thermal imaging camera (FLIR E60, USA), and corresponding thermal  
97 images were captured to visually demonstrate the thermal response behavior of the  
98 material under NIR excitation. (Keep the spot size of  $1 \text{ cm}^2$  and the irradiation distance  
99 of 5 cm unchanged.)

100 To further investigate the influence of material concentration and laser power on  
101 photothermal performance, dispersions of MWCNTs/Fe-N-C at concentrations of 12.5,  
102 25, and  $50 \mu\text{g/mL}$  were prepared and tested under the same irradiation conditions.  
103 Additionally, the laser power was adjusted to 0.5, 0.75, 1.0, and  $1.25 \text{ W cm}^{-2}$  to compare  
104 the temperature elevation profiles at different power levels, thereby revealing the  
105 relationship between concentration, laser power, and photothermal response.

106 To assess the photothermal stability of the material, five consecutive heating–cooling  
107 cycles were performed. For each cycle, the sample was irradiated for 2 minutes until  
108 the temperature reached its peak, followed by natural cooling to room temperature. This  
109 process was repeated five times, and the temperature rise and cooling curves of each  
110 cycle were recorded to evaluate the stability and repeatability of the material under  
111 repeated photothermal stimulation.

112 Based on the recorded temperature data, the photothermal conversion efficiency ( $\eta$ )  
113 was calculated using the Roper model equation as follows:

$$114 \quad \eta = \frac{hS - (T_{\max} - T_{\text{surr}}) - Q_{\text{dis}}}{I(1 - 10^{-A_{808}})} \quad (\text{Formula S4})$$

115 Where  $hS$  is the heat transfer coefficient of the system, determined by fitting the cooling  
116 stage of the temperature curve;  $T_{\max}$  and  $T_{\text{surr}}$  are the maximum and ambient  
117 temperatures, respectively;  $Q_{\text{dis}}$  represents the heat loss of the system, determined from  
118 control experiments without the material;  $I$  is the laser input power ( $\text{W cm}^{-2}$ );  $A_{808}$  is  
119 the absorbance of the material at 808 nm, obtained from UV-Vis spectroscopy  
120 measurements.

121 This analysis enables the quantification of the photothermal conversion efficiency of  
122 MWCNTs/Fe-N-C under different experimental conditions and provides fundamental  
123 data to support its application as a photothermal amplifier in multimodal detection  
124 platforms.

125 **Aptamer Affinity Validation.** The binding affinity between aptamers and bisphenol  
126 A (BPA) was verified via polyacrylamide gel electrophoresis (PAGE). Samples with

127 different components were loaded into the gel wells in a preset order, and the well  
128 distribution was detailed as follows:

129 Well 1: Molecular weight marker;

130 Well 2: Aptamer DNA<sub>2</sub> solution;

131 Well 3: Aptamer DNA<sub>1</sub> solution;

132 Well 4: Equal-volume mixture of DNA<sub>2</sub> and DNA<sub>1</sub>;

133 Well 5: Incubated solution of DNA<sub>2</sub>-DNA<sub>1</sub> mixture with BPA at a final concentration  
134 of 0.1 nM;

135 Well 6: Incubated solution of DNA<sub>2</sub>-DNA<sub>1</sub> mixture with BPA at a final concentration  
136 of 1 nM;

137 Well 7: Incubated solution of DNA<sub>2</sub>-DNA<sub>1</sub> mixture with BPA at a final concentration  
138 of 5 nM;

139 Well 8: Incubated solution of DNA<sub>2</sub>-DNA<sub>1</sub> mixture with BPA at a final concentration  
140 of 10 nM;

141 Well 9: Incubated solution of DNA<sub>2</sub>-DNA<sub>1</sub> mixture with BPA at a final concentration  
142 of 50 nM;

143 Well 10: Incubated solution of DNA<sub>2</sub>-DNA<sub>1</sub> mixture with BPA at a final  
144 concentration of 100 nM.

145 All samples were loaded at a consistent volume of 6  $\mu$ L. Prior to loading, the samples  
146 were denatured at 95 °C for 5 min and then placed on ice for 10 min to maintain the  
147 nucleic acid conformation.

148 The experimental results demonstrated that aptamers DNA<sub>1</sub> and DNA<sub>2</sub>, either  
149 individually or in combination, maintained a stable nucleic acid conformation, with no  
150 significant non-specific binding observed between the two aptamers. Within the BPA  
151 concentration gradient of 0.1-100 nM, the binding of the aptamer mixture to BPA  
152 exhibited a distinct concentration dependence: low-concentration BPA (0.1 nM) could  
153 specifically bind to the aptamers, as evidenced by a significant reduction in the  
154 migration rate of gel bands; as the BPA concentration increased to 50-100 nM, the band  
155 migration rate reached a plateau, indicating that the binding between aptamers and BPA  
156 achieved a saturated state. In conclusion, the selected nucleic acid aptamers DNA<sub>1</sub> and  
157 DNA<sub>2</sub> in this study exhibited high affinity and specificity toward BPA, with a binding  
158 saturation concentration range of 50-100 nM. Moreover, effective binding was still  
159 achievable even at a low BPA concentration of 0.1 nM, which endows the aptamers  
160 with great potential for the detection of trace BPA in environmental samples.

161 **Optimization of Multimodal Detection Performance.** To achieve optimal  
162 colorimetric detection performance, several key parameters were systematically  
163 optimized, including the concentration of the T-line hairpin probe DNA<sub>2</sub>, the amount  
164 of MWCNTs/Fe-N-C catalyst, the coupling concentration of ssDNA<sub>1</sub>, and the spraying  
165 volume of the signal probe. A 100  $\mu$ L standard sample solution was applied to the  
166 sample pad, and after incubation at room temperature for 30 minutes, the T-line signal  
167 intensity was measured using a portable strip reader to determine the optimal detection  
168 conditions.

169 For the catalytic colorimetric mode, further optimization was carried out by  
170 systematically evaluating the H<sub>2</sub>O<sub>2</sub> concentrations (4, 6, 8, 10, and 15 mM) and their  
171 molar ratios with TMB. The optimal conditions were determined to achieve higher  
172 signal-to-noise ratios and lower detection limits, ensuring the efficient detection of  
173 BPA.

174 **Specificity Analysis.** To validate the molecular recognition specificity of the platform  
175 for BPA, structurally similar compounds, including bisphenol S (BPS), bisphenol F  
176 (BPF), phenol, and nonylphenol (NP), were used as interference controls. The signal  
177 responses were evaluated under three detection modes: colorimetric, catalytic  
178 colorimetric, and photothermal. By comparing the T-line signal intensities of different  
179 analytes, the platform's high specificity for BPA was confirmed, effectively avoiding  
180 false-positive signals from interfering substances and ensuring the accuracy and  
181 reliability of the detection results.

182 **Real Sample Analysis and Recovery Evaluation.** To assess the applicability of the  
183 LFA platform for detecting BPA in real environmental samples, lake water samples  
184 were collected, filtered through 0.22 μm membranes to remove impurities, and then  
185 appropriately diluted. The lake water sample was collected from Binhai Lake of Linyi  
186 University. Its key water quality parameters are as follows: pH 7.63, conductivity  
187 112.86 μS/cm, dissolved oxygen 10.23 mg/L, dissolved organic carbon (DOC) 5.84  
188 mg/L, total nitrogen (TN) 1.98 mg/L, and total dissolved solids 126 mg/L. The  
189 concentrations of major inorganic ions in the water are within the normal range of  
190 natural freshwater lakes. The water sample has low background impurity content and

191 weak overall matrix interference. Known concentrations of BPA (0.5, 5, and 50 ng/mL)  
192 were spiked into these samples for recovery experiments. Detection was carried out  
193 following the optimized procedures, and the recovery was calculated using the  
194 following equation:

$$195 \quad \text{Recovery} = \frac{\text{Measured Concentration}}{\text{Spiked Concentration}} \times 100\% \text{ (Formula S5)}$$

196 In addition, the relative standard deviation (RSD) was calculated to evaluate the  
197 repeatability and stability of the detection. By comparing the recovery rates and RSD  
198 values at different spiking concentrations, the accuracy and reliability of the multimodal  
199 LFA platform for detecting BPA in real water samples were comprehensively validated.

200

201 **Supporting Figures**

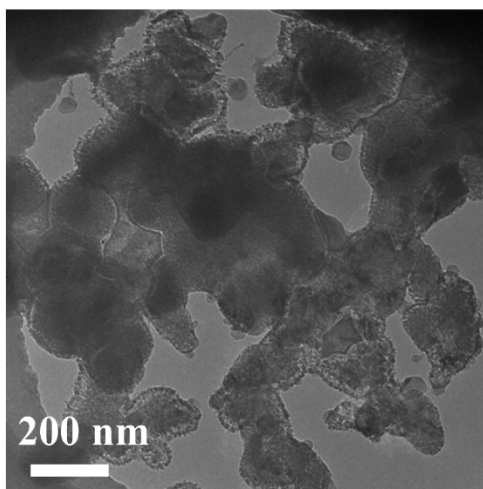

202

203

Figure S1 TEM image of MWCNTs/Fe-N-C/ssDNA<sub>1</sub>.

204

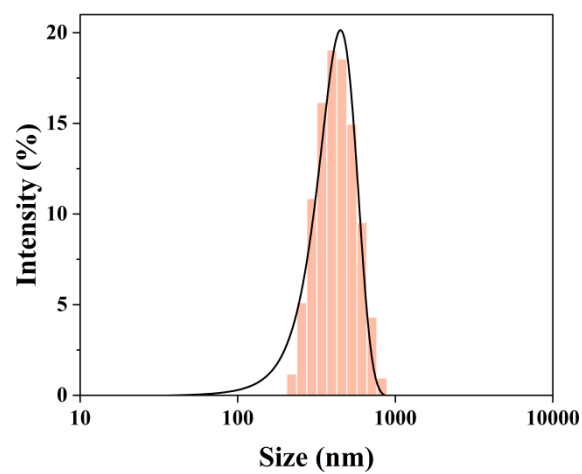

205

206

Figure S2 Hydrodynamic size distribution of MWCNTs/Fe-N-C/ssDNA<sub>1</sub>.

207

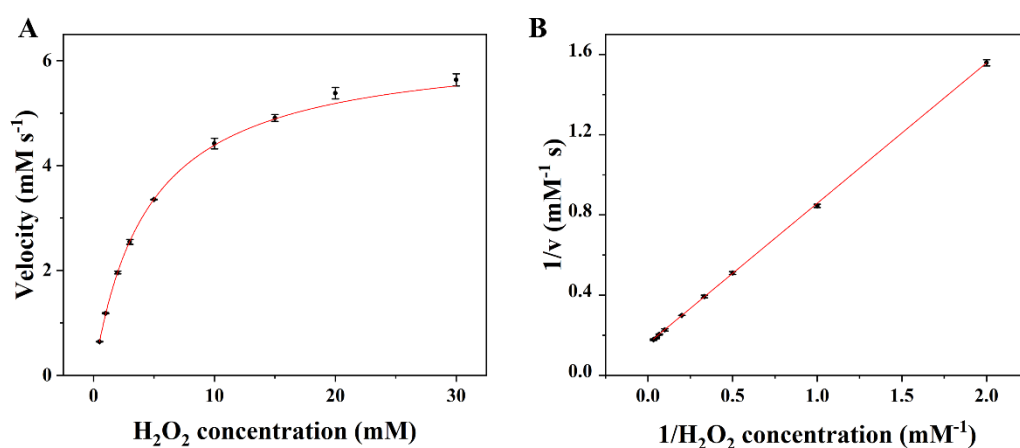

208

209 Figure S3 A) Michaelis-Menten curve of MWCNTs/Fe-N-C and B) Lineweaver-Burk

210 (L-B) plot derived from the kinetic data with H<sub>2</sub>O<sub>2</sub> as the substrate.

211

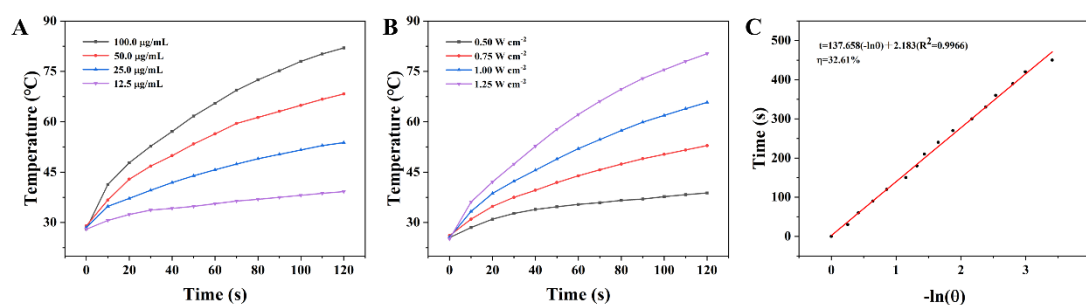

212

213 Figure S4 A) Photothermal heating curves of MWCNTs/Fe-N-C dispersions with

214 different concentrations under 808 nm laser irradiation. B) Temperature elevation of

215 MWCNTs/Fe-N-C dispersions under different laser power densities. C) Comparison

216 of photothermal conversion efficiencies before and after ssDNA<sub>1</sub> modification on

217 MWCNTs/Fe-N-C.

218

219

220

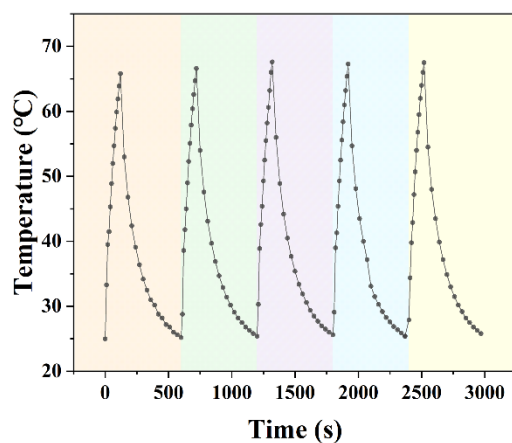

221

222 Figure S5 Photothermal stability of MWCNTs/Fe-N-C/ssDNA<sub>1</sub> evaluated by five

223

consecutive heating-cooling cycles.

224

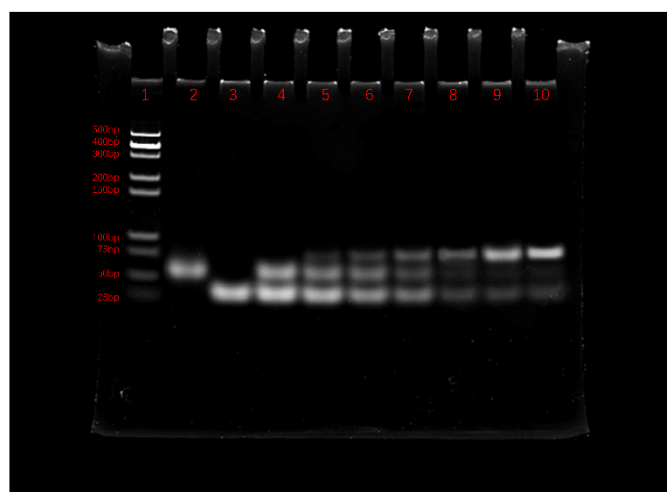

225

226 Figure S6 Polyacrylamide Gel Electrophoresis (PAGE) Image.

227

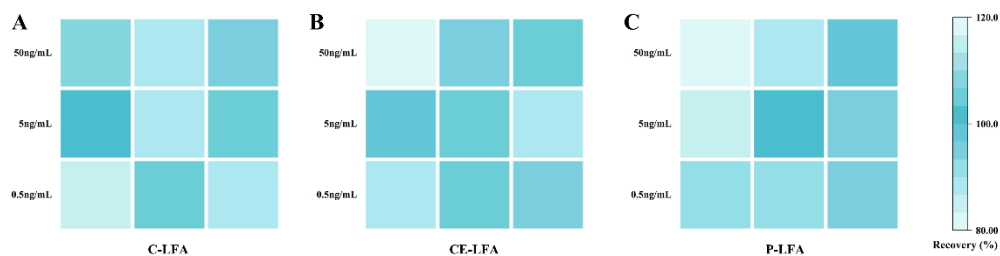

228

229 Figure S7 Heat map of the recoveries of developed multimodal LFA for the detection

230

of BPA in lake samples.

231 **Table S1.** Comparison of related studies reported in the past three years.

| Method                 | Material             | Year                            | LOD         | Linear range     |
|------------------------|----------------------|---------------------------------|-------------|------------------|
| This work              | MWCNTs/Fe-N-C        | 2026                            | 0.047 ng/mL | 0.05-1000 ng/mL  |
| Test strip             | AuNPs                | Komova <i>et al.</i><br>(2024)  | 13.5 ng/mL  | 0.05-0.25 µg/mL  |
| Test strip             | MPs/QDs              | Aranova <i>et al.</i><br>(2025) | 0.03 µg/mL  | 0.3-100 µg/mL    |
| Electrochemical sensor | Ag@NC/PEI            | Shim <i>et al.</i><br>(2026)    | 1.43 ng/mL  | 22-2200000 ng/mL |
| HPLC                   | pH-responsive<br>DES | Cao & Li<br>(2024)              | 0.05ng/mL   | 0.1-50 ng/mL     |

232

233 [1] N. S. Komova, K. V. Serebrennikova, A. N. Berlina, A. V. Zherdev and B. B.  
234 Dzantiev, *Journal of Analytical Chemistry*, 2024, 79, 476-485.

235 [2] N. A. Taranova, A. A. Bulanaya, A. V. Zherdev, B. B. Dzantiev, *Sensors*, 2025,  
236 25, 7328.

237 [3] K. Shim, M. M. Karim, S. Park, H. K. Lee, D. Lee, J.-S. Bae, D.-S. Park, H. J.  
238 Kim, *Applied Surface Science*, 2026, 731, 166391.

239 [4] L. Cao and Y. Li, *Journal of Separation Science*, 2024, 47, e2300776.

240
